# Supplementary material
Source: PubMed Central journal article supplement (PMC9795486)
Supplement: NIHMS1855470-supplement-Supplemental_Tables.pdf [file NIHMS1855470-supplement-Supplemental_Tables.pdf]

**Supplementary Table 1: The fly alleles used in this study.**

| Fly allele                                             | Source                                                  | Stock number |
|--------------------------------------------------------|---------------------------------------------------------|--------------|
| <i>w<sup>1118</sup>- mdg4-TR (attP2 &amp;attP40)</i>   | This paper                                              | N/A          |
| <i>w<sup>1118</sup>- mdg4-PC (attP2 &amp;attP40)</i>   | This paper                                              | N/A          |
| <i>w<sup>1118</sup>- mdg4-NC (attP2 &amp;attP40)</i>   | This paper                                              | N/A          |
| <i>w<sup>1118</sup>-3S18-TR (attP2)</i>                | This paper                                              | N/A          |
| <i>w<sup>1118</sup>-412-TR (attP2 &amp;attP40)</i>     | This paper                                              | N/A          |
| <i>w<sup>1118</sup>-Blood-TR (attP2 &amp;attP40)</i>   | This paper                                              | N/A          |
| <i>w<sup>1118</sup>-Burdock-TR (attP2 &amp;attP40)</i> | This paper                                              | N/A          |
| <i>w<sup>1118</sup>-Copia-TR (attP2 &amp;attP40)</i>   | This paper                                              | N/A          |
| <i>w<sup>1118</sup>-Mdg1-TR (attP2 &amp;attP40)</i>    | This paper                                              | N/A          |
| <i>w; ac5c-gal4/CyO; mdg4-TR/TM3,Sb,Ser</i>            | This paper                                              | N/A          |
| <i>w; ac5c-gal4/CyO; Tub-gal80<sup>ts</sup>/TM3,Sb</i> | This paper                                              | N/A          |
| <i>w; ac5c-gal4/CyO:gfp</i>                            | This paper                                              | N/A          |
| <i>w; tjgal4/CyO; mdg4-TR/TM3,Sb</i>                   | This paper                                              | N/A          |
| <i>w<sup>1118</sup>; sh-white (attP2)</i>              | Senti <i>et al.</i> , <i>Genes &amp; Dev.</i> ,<br>2015 | N/A          |
| <i>w<sup>1118</sup>; sh-piwi (attP2)</i>               | Senti <i>et al.</i> , <i>Genes &amp; Dev.</i> ,<br>2015 | N/A          |
| <i>w<sup>1118</sup>; iso2; sh-white/TM6B,Tb,Hu</i>     | This paper                                              | N/A          |
| <i>w<sup>1118</sup>; iso2; sh- mdg4-1/TM6B,Tb,Hu</i>   | This paper                                              | N/A          |
| <i>w<sup>1118</sup>; iso2; sh- mdg4-2/TM6B,Tb,Hu</i>   | This paper                                              | N/A          |
| <i>w<sup>1118</sup>; iso2; sh- mdg4-3/TM6B,Tb,Hu</i>   | This paper                                              | N/A          |
| <i>w<sup>1118</sup>; iso2; sh- mdg4-4/TM6B,Tb,Hu</i>   | This paper                                              | N/A          |
| <i>w<sup>1118</sup>; iso2; sh- mdg4-5/TM6B,Tb,Hu</i>   | This paper                                              | N/A          |
| <i>w<sup>1118</sup>; iso2; sh- mdg4-6/TM6B,Tb,Hu</i>   | This paper                                              | N/A          |

|                                                      |                                        |              |
|------------------------------------------------------|----------------------------------------|--------------|
| <i>w<sup>1118</sup>; iso2; sh- mdg4-7/TM6B,Tb,Hu</i> | This paper                             | N/A          |
| <i>sh-dcr2</i>                                       | BDSC                                   | CAT#: 33656  |
| <i>sh-ago2</i>                                       | BDSC                                   | CAT#: 34799  |
| <i>sh-pelle</i>                                      | BDSC                                   | CAT#: 41935  |
| <i>sh-relish</i>                                     | BDSC                                   | CAT#: 33661  |
| <i>sh-dSTING</i>                                     | VDRC                                   | CAT#: 4031   |
| <i>dcr-2<sup>L811fsX</sup>/CyO</i>                   | Lee <i>et al.</i> , <i>Cell</i> , 2004 | N/A          |
| <i>w<sup>1118</sup>; If/CyO; iso3</i>                | VDRC                                   | CAT#: 313596 |
| <i>w<sup>1118</sup>; iso2; Dr/TM6B,Tb,Hu</i>         | VDRC                                   | CAT#: 313597 |

**Supplementary Table 2: Fly genotypes for each figure.**

| Genotype                                                                                                                                                                                                                                                                                                                                                                                                                                                                                                                                                                                                                                                                                               | Figure                                |
|--------------------------------------------------------------------------------------------------------------------------------------------------------------------------------------------------------------------------------------------------------------------------------------------------------------------------------------------------------------------------------------------------------------------------------------------------------------------------------------------------------------------------------------------------------------------------------------------------------------------------------------------------------------------------------------------------------|---------------------------------------|
| <i>mdg4</i> -TR: <i>w</i> <sup>1118</sup> - <i>mdg4</i> -TR (attP2)<br><i>mdg4</i> -PC: <i>w</i> <sup>1118</sup> - <i>mdg4</i> -PC (attP2)<br><i>mdg4</i> -NC: <i>w</i> <sup>1118</sup> - <i>mdg4</i> -NC (attP2)                                                                                                                                                                                                                                                                                                                                                                                                                                                                                      | Figure 1b                             |
| <i>mdg4</i> -TR: <i>w</i> <sup>1118</sup> - <i>mdg4</i> -TR (attP2)                                                                                                                                                                                                                                                                                                                                                                                                                                                                                                                                                                                                                                    | Figure 1c                             |
| <i>w</i> <sup>1118</sup> - <i>mdg4</i> -TR (attP2)                                                                                                                                                                                                                                                                                                                                                                                                                                                                                                                                                                                                                                                     | Figure 2a, b and d (Different stages) |
| Positive control: <i>w</i> <sup>*</sup> ; <i>tj-Gal4</i> ; <i>sh-piwi</i><br>Negative control: <i>w</i> <sup>*</sup> ; <i>ac5c-Gal4</i> ; <i>sh-mdg4-1</i>                                                                                                                                                                                                                                                                                                                                                                                                                                                                                                                                             | Figure 2d                             |
| Lab strain-1: <i>w</i> <sup>*</sup> ; <i>ac5c-Gal4</i> /CyO; <i>mdg4</i> -TR<br>Lab strain-2: <i>w</i> <sup>*</sup> ; <i>ac5c-Gal4</i> /CyO; <i>tub-Gal80</i> <sup>ts</sup>                                                                                                                                                                                                                                                                                                                                                                                                                                                                                                                            | Figure 3                              |
| <i>sh-white</i> : <i>w</i> <sup>*</sup> ; <i>ac5c-Gal4</i> ; <i>mdg4</i> -TR/ <i>sh-white</i><br><i>sh-mdg4</i> : <i>w</i> <sup>*</sup> ; <i>ac5c-Gal4</i> ; <i>mdg4</i> -TR/ <i>sh-mdg4-1</i>                                                                                                                                                                                                                                                                                                                                                                                                                                                                                                         | Figure 4a; Extended Data Fig. 4       |
| <i>sh-white</i> : <i>w</i> <sup>*</sup> ; <i>ac5c-Gal4</i> ; <i>tub-Gal80</i> <sup>ts</sup> / <i>sh-white</i><br><i>sh-mdg4</i> : <i>w</i> <sup>*</sup> ; <i>ac5c-Gal4</i> ; <i>tub-Gal80</i> <sup>ts</sup> / <i>sh-mdg4-1</i>                                                                                                                                                                                                                                                                                                                                                                                                                                                                         | Figure 4b and 4c                      |
| <i>sh-white</i> : <i>w</i> <sup>*</sup> ; <i>ac5c-Gal4</i> ; <i>mdg4</i> -TR/ <i>sh-white</i><br><i>sh-mdg4</i> : <i>w</i> <sup>*</sup> ; <i>ac5c-Gal4</i> ; <i>mdg4</i> -TR/ <i>sh-mdg4-1</i>                                                                                                                                                                                                                                                                                                                                                                                                                                                                                                         | Figure 5a and b                       |
| <i>sh-white</i> : <i>w</i> <sup>*</sup> ; <i>ac5c-Gal4</i> ; <i>tub-Gal80</i> <sup>ts</sup> / <i>sh-white</i><br><i>sh-mdg4</i> : <i>w</i> <sup>*</sup> ; <i>ac5c-Gal4</i> ; <i>tub-Gal80</i> <sup>ts</sup> / <i>sh-mdg4-1</i>                                                                                                                                                                                                                                                                                                                                                                                                                                                                         | Figure 5c and d                       |
| <i>sh-white</i> : <i>w</i> <sup>*</sup> ; <i>ac5c-Gal4</i> ; <i>tub-Gal80</i> <sup>ts</sup> / <i>sh-white</i><br><i>sh-mdg4</i> : <i>w</i> <sup>*</sup> ; <i>ac5c-Gal4</i> ; <i>tub-Gal80</i> <sup>ts</sup> / <i>sh-mdg4-1</i><br><i>sh-relish</i> : <i>w</i> <sup>*</sup> ; <i>ac5c-Gal4</i> ; <i>tub-Gal80</i> <sup>ts</sup> / <i>sh-relish</i><br><i>sh-dcr-2</i> : <i>w</i> <sup>*</sup> ; <i>ac5c-Gal4</i> ; <i>tub-Gal80</i> <sup>ts</sup> / <i>sh-dcr-2</i><br><i>sh-ago-2</i> : <i>w</i> <sup>*</sup> ; <i>ac5c-Gal4</i> ; <i>tub-Gal80</i> <sup>ts</sup> / <i>sh-ago-2</i><br><i>sh-pelle</i> : <i>w</i> <sup>*</sup> ; <i>ac5c-Gal4</i> ; <i>tub-Gal80</i> <sup>ts</sup> / <i>sh-pelle</i>   | Figure 6a, d and e                    |
| <i>sh-white</i> : <i>w</i> <sup>*</sup> ; <i>ac5c-Gal4</i> ; <i>mdg4</i> -TR/ <i>sh-white</i><br><i>sh-relish</i> : <i>w</i> <sup>*</sup> ; <i>ac5c-Gal4</i> ; <i>mdg4</i> -TR/ <i>sh-relish</i>                                                                                                                                                                                                                                                                                                                                                                                                                                                                                                       | Figure 6b and c                       |
| <i>sh-white</i> : <i>w</i> <sup>*</sup> ; <i>ac5c-Gal4</i> ; <i>sh-white</i><br><i>sh-mdg4</i> : <i>w</i> <sup>*</sup> ; <i>ac5c-Gal4</i> ; <i>sh-mdg4-5</i><br><i>sh-relish</i> : <i>w</i> <sup>*</sup> ; <i>ac5c-Gal4</i> ; <i>sh-relish</i>                                                                                                                                                                                                                                                                                                                                                                                                                                                         | Figure 7a and b                       |
| <i>sh-white</i> : <i>w</i> <sup>*</sup> ; <i>ac5c-Gal4</i> ; <i>sh-white</i><br><i>sh-dSTING</i> : <i>w</i> <sup>*</sup> ; <i>ac5c-Gal4</i> ; <i>dSTING</i>                                                                                                                                                                                                                                                                                                                                                                                                                                                                                                                                            | Figure 8a and b                       |
| <i>sh-white</i> : <i>w</i> <sup>*</sup> ; <i>ac5c-Gal4</i> ; <i>tub-Gal80</i> <sup>ts</sup> / <i>sh-white</i><br><i>sh-dSTING</i> : <i>w</i> <sup>*</sup> ; <i>ac5c-Gal4</i> ; <i>tub-Gal80</i> <sup>ts</sup> / <i>sh-dSTING</i>                                                                                                                                                                                                                                                                                                                                                                                                                                                                       | Figure 8c and d                       |
| 3S18: <i>w</i> <sup>1118</sup> -3S18-TR (attP2)<br>412: <i>w</i> <sup>1118</sup> -412-TR (attP2 and attP40)<br><i>Mdg1</i> : <i>w</i> <sup>1118</sup> - <i>Mdg1</i> -TR (attP2 and attP40)<br><i>blood</i> : <i>w</i> <sup>1118</sup> - <i>blood</i> -TR (attP2 and attP40)<br><i>I-element</i> : <i>w</i> <sup>1118</sup> - <i>I-element</i> -TR (attP2 and attP40)<br><i>Copia</i> : <i>w</i> <sup>1118</sup> - <i>Copia</i> -TR (attP2 and attP40)<br><i>Doc</i> : <i>w</i> <sup>1118</sup> - <i>Doc</i> -TR (attP2 and attP40)<br><i>Burdock</i> : <i>w</i> <sup>1118</sup> - <i>Burdock</i> -TR (attP2 and attP40)<br><i>mdg4</i> : <i>w</i> <sup>1118</sup> - <i>mdg4</i> -TR (attP2 and attP40) | Extended Data Fig. 1b                 |
| <i>mdg4</i> -TR: <i>w</i> <sup>1118</sup> - <i>mdg4</i> -TR (attP2)<br><i>mdg4</i> -PC: <i>w</i> <sup>1118</sup> - <i>mdg4</i> -PC (attP2)                                                                                                                                                                                                                                                                                                                                                                                                                                                                                                                                                             | Extended Data Fig. 1c                 |

|                                                                                                                                                                                                                                                |                                                    |
|------------------------------------------------------------------------------------------------------------------------------------------------------------------------------------------------------------------------------------------------|----------------------------------------------------|
| <i>mdg4</i> -NC: <i>w</i> <sup>1118</sup> - <i>mdg4</i> -NC (attP2)                                                                                                                                                                            |                                                    |
| <i>w</i> <sup>1118</sup> - <i>mdg4</i> -TR (attP2)                                                                                                                                                                                             | Extended Data Fig. 2b and c                        |
| <i>w</i> <sup>1118</sup> - <i>mdg4</i> -TR (attP2)                                                                                                                                                                                             | Extended Data Fig. 3b and c<br>(Different tissues) |
| PC: <i>w</i> <sup>1118</sup> - <i>mdg4</i> -PC (attP2)<br>NC: <i>w</i> <sup>1118</sup> - <i>mdg4</i> -NC (attP2)                                                                                                                               | Extended Data Fig. 3c                              |
| <i>w</i> <sup>*</sup> ; <i>ac5c</i> -Gal4/CyO; tub-Gal80ts                                                                                                                                                                                     | Extended Data Fig. 4                               |
| <i>sh-white</i> : <i>w</i> <sup>*</sup> ; <i>ac5c</i> -Gal4; <i>sh-white</i><br><i>sh-mdg4-X</i> : <i>w</i> <sup>*</sup> ; <i>ac5c</i> -Gal4; <i>sh-mdg4-X</i>                                                                                 | Extended Data Fig. 5a, 5d<br>and 5e                |
| <i>sh-white</i> : <i>w</i> <sup>*</sup> ; <i>ac5c</i> -Gal4; <i>mdg4</i> -TR/ <i>sh-white</i><br><i>sh-mdg4-1</i> : <i>w</i> <sup>*</sup> ; <i>ac5c</i> -Gal4; <i>mdg4</i> -TR/ <i>sh-mdg4-1</i>                                               | Extended Data Fig. 5b and c                        |
| <i>w</i> <sup>*</sup> ; <i>ac5c</i> -Gal4; tub-Gal80 <sup>ts</sup> /UAS-GFP                                                                                                                                                                    | Extended Data Fig. 6b                              |
| <i>sh-white</i> : <i>w</i> <sup>*</sup> ; <i>ac5c</i> -Gal4; tub-Gal80 <sup>ts</sup> / <i>sh-white</i><br><i>sh-mdg4</i> : <i>w</i> <sup>*</sup> ; <i>ac5c</i> -Gal4; tub-Gal80 <sup>ts</sup> / <i>sh-mdg4-1</i>                               | Extended Data Fig. 6c and d                        |
| <i>sh-white</i> : <i>w</i> <sup>*</sup> ; <i>ac5c</i> -Gal4; <i>mdg4</i> -TR/ <i>sh-white</i><br><i>sh-mdg4</i> : <i>w</i> <sup>*</sup> ; <i>ac5c</i> -Gal4; <i>mdg4</i> -TR/ <i>sh-mdg4-1</i>                                                 | Extended Data Fig. 7a, b<br>and c                  |
| <i>sh-white</i> : <i>w</i> <sup>*</sup> ; <i>ac5c</i> -Gal4; tub-Gal80 <sup>ts</sup> / <i>sh-white</i><br><i>sh-mdg4</i> : <i>w</i> <sup>*</sup> ; <i>ac5c</i> -Gal4; tub-Gal80 <sup>ts</sup> / <i>sh-mdg4-1</i>                               | Extended Data Fig. 7d                              |
| <i>sh-white</i> : <i>w</i> <sup>*</sup> ; <i>ac5c</i> -Gal4; <i>mdg4</i> -TR/ <i>sh-white</i><br><i>sh-relish</i> : <i>w</i> <sup>*</sup> ; <i>ac5c</i> -Gal4; <i>mdg4</i> -TR/ <i>sh-relish</i>                                               | Extended Data Fig. 8a and b                        |
| <i>sh-white</i> : <i>w</i> <sup>*</sup> ; <i>ac5c</i> -Gal4; tub-Gal80 <sup>ts</sup> / <i>sh-white</i><br><i>sh-relish</i> : <i>w</i> <sup>*</sup> ; <i>ac5c</i> -Gal4; tub-Gal80 <sup>ts</sup> / <i>sh-relish</i>                             | Extended Data Fig. 8c and d                        |
| <i>dcr2</i> <sup>L811fsx</sup> / <i>dcr2</i> <sup>L811fsx</sup>                                                                                                                                                                                | Extended Data Fig. 8e                              |
| <i>sh-white</i> : <i>w</i> <sup>*</sup> ; <i>ac5c</i> -Gal4; <i>sh-white</i><br><i>sh-mdg4</i> : <i>w</i> <sup>*</sup> ; <i>ac5c</i> -Gal4; <i>sh-mdg4-1</i>                                                                                   | Extended Data Fig. 8f                              |
| <i>sh-white</i> : <i>w</i> <sup>*</sup> ; <i>ac5c</i> -Gal4; <i>sh-white</i><br><i>sh-mdg4</i> : <i>w</i> <sup>*</sup> ; <i>ac5c</i> -Gal4; <i>sh-mdg4-5</i><br><i>sh-relish</i> : <i>w</i> <sup>*</sup> ; <i>ac5c</i> -Gal4; <i>sh-relish</i> | Extended Data Fig. 9a                              |
| <i>w</i> <sup>1118</sup> - <i>mdg4</i> -TR (attP2)                                                                                                                                                                                             | Extended Data Fig. 9b                              |
| <i>sh-white</i> : <i>w</i> <sup>*</sup> ; <i>ac5c</i> -Gal4; <i>sh-white</i><br><i>sh-mdg4</i> : <i>w</i> <sup>*</sup> ; <i>ac5c</i> -Gal4; <i>sh-mdg4-5</i>                                                                                   | Extended Data Fig. 9c                              |

**Supplementary Table 3a: Primers used for RT-PCR and RT-qPCR.**

| Gene                                     | Sequence                                                          | Experiment          |
|------------------------------------------|-------------------------------------------------------------------|---------------------|
| <i>mdg4-gag</i><br>(Full length of mRNA) | F: 5'-AGACAATCGGCCATATACGC-3'<br>R: 5'-TTTCCAATCCTTGCCTCAAC-3'    | RT-PCR              |
| <i>mdg4-env</i><br>(Spliced mRNA)        | F: 5'- GGCTCATTGCCGTTAAACAT-3'<br>R: 5'- CAAGAGGTCACGCTGTTCAA-3'  | RT-PCR              |
| GFP reporter                             | F: 5'- CGGGACTACTCCGGTAAACA-3'<br>R: 5'- CTAGGCACACCGAAACGACT-3'  | RT-PCR              |
| DCV-RT (4235-4863)                       | F: 5'- CGACTCGTACTGGGGATTGT-3'<br>R: 5'- AGGAAATCCTGGTGACGTTG-3'  | RT-PCR              |
| DCV-RT (3133-4328)                       | F: 5'- GTTGCCTTATCTGCTCTG-3'<br>R: 5'- CGCATAACCATGCTCTTCTG-3'    | RT-PCR              |
| DCV-RTQ                                  | F: 5'- CAGGACACCCTCTCTGCTTC-3'<br>R: 5'- CCGCAGTGGTACTAGGGGTA-3'  | RT-qPCR             |
| <i>relish</i>                            | F: 5'- TACAAGAGCGAGATGCATGG-3'<br>R: 5'- ATAAATTGCGCCACATAGCC-3'  | RT-qPCR             |
| <i>sting</i>                             | F: 5'- TCCCGATGAGATGTTTGTCA-3'<br>R: 5'- GCCAGGTACCCGACAAGTTA-3'  | RT-qPCR             |
| <i>dcr2</i>                              | F: 5'- GTTCCGCTTTGGTCAACAAT-3'<br>R: 5'- AGTCGGCTGAACATCAGCTT-3'  | RT-qPCR             |
| <i>ago2</i>                              | F: 5'- CACCATTGTGCATCCTAACG-3'<br>R: 5'- CATGTGGCACAGGTTGTAGG-3'  | RT-qPCR             |
| <i>pelle</i>                             | F: 5'- CGGAAAACGAGACGAAGAAG-3'<br>R: 5'- GGCCCATCTAGTCGGTAACA-3'  | RT-qPCR             |
| <i>rp49</i>                              | F: 5'- CCGCTTCAAGGGACAGTATCTG-3'<br>R: 5'- ATCTCGCCGCAGTAAACGC-3' | RT-PCR &<br>RT-qPCR |

**Supplementary Table 3b:** Primers used for constructing plasmids:

| Construct                                                         | Sequence                                                                                                                                                                         |
|-------------------------------------------------------------------|----------------------------------------------------------------------------------------------------------------------------------------------------------------------------------|
| <i>mdg4-rpsL-neo</i><br>( <i>mdg4-TR</i> &<br><i>mdg4-TR-NC</i> ) | F: 5'-CTTATTAAGGGGAGGGTGGTCCACAAGGACAACCT<br>CAAGTAGACATTCCCGGCCTGGTGATGATGGCGGGATCG-3'<br>R: 5'-TACTACAGTGCTCGGATTTTCCTTGACATAACTTAC<br>TACCTAACTGTAGATCAGAAGAAGGCG-3'          |
| <i>mdg4-TR</i> &<br><i>mdg4-TR-NC</i>                             | F: 5'-CTTATTAAGGGGAGGGTGGTCCACAAGGACAACC<br>TCAAGTAGACATTCCCGGCCTGGTGATGATGGCGGGATCG-3'<br>R: 5'-TACTACAGTGCTCGGATTTTCCTTGACATAACTTA<br>CTACCTAACTGTAGATATGCCGAATGGGCATTTATTG-3' |
| <i>412-rpsL-neo</i>                                               | F: 5'-AACTTATATTTTCCTTAATCATTTACACAAATTTTC<br>ATACACTACGTATGGCCTGGTGATGATGGCGGGATCG-3'<br>R: 5'-TGTTTTTGTGTTGAACAACAATAGTTGATTTTATAATGC<br>AAAGATAAAAATTCAGAAGAAGGCG-3'          |
| <i>412-TR</i>                                                     | F: 5'-AACTTATATTTTCCTTAATCATTTACACAAATTTTC<br>CATACTACGTATGGCGCGCCGGTACCGAAT-3'<br>R: TGTTTTTGTGTTGAACAACAATAGTTGATTTTATAATG<br>CAAAGATAAAAATTTATGCCGAATGGGCATTTATTG-3'          |
| <i>Blood-rpsL-neo</i>                                             | F: 5'-CATAATAAAACTTAAATAACGGCCTGATCAGCCAA<br>AACAATATAACAAAGGGCCTGGTGATGATGGCGGGATCG-3'<br>R: 5'-AAAAAATATGTATGTATTTTGAATTAATAAAAATTCG<br>ATTATGTCTATGTTTCAGAAGAAGGCG-3'         |
| <i>Blood-TR</i>                                                   | F: 5'-CATAATAAAACTTAAATAACGGCCTGATCAGCCAA<br>AACAATATAACAAAGGGCCTGGTGATGATGGCGGGATCG-3'<br>R: 5'-AAAAAATATGTATGTATTTTGAATTAATAAAAATTC<br>GATTATGTCTATGTTATGCCGAATGGGCATTTATTG-3' |
| <i>Burdock-rpsL-neo</i>                                           | F: 5'-TACTGAAACGACGAACTGAATAATATCTGCCATCAGA<br>CGCCAACCAGAGTGGCCTGGTGATGATGGCGGGATCG-3'<br>R: 5'-TGCTGATGTTGGTTGAACTAGTTGACCATCAAACGTA<br>TGTGTTGAACGCTCAGAAGAAGGCG-3'           |
| <i>Burdock-TR</i>                                                 | F: 5'-TACTGAAACGACGAACTGAATAATATCTGCCATCA<br>GACGCCAACCAGAGTGGCGCGCCGGTACCGAAT-3'<br>R: 5'-TGCTGATGTTGGTTGAACTAGTTGACCATCAAACG<br>TATGTGTTGAACGCTATGCCGAATGGGCATTTATTG-3'        |

|                                    |                                                                                                                                                                                  |
|------------------------------------|----------------------------------------------------------------------------------------------------------------------------------------------------------------------------------|
| <i>Copia</i> -rpsL-neo             | F: 5'-CATATTTTGTACAAATGATCTGATCGGGTTTTCTGGG<br>TTTTCCCCGTATGGCCTGGTATGATGGCGGGATCG-3'<br>R: 5'-GGTGGTGTGCATTCTGGGAAGTGTTAACTGATCCAG<br>CATTTGCTGCGAGGTCAGAAGAACTCGTCAAGAAGGCG-3' |
| <i>Copia</i> -TR                   | F: 5'-CATATTTTGTACAAATGATCTGATCGGGTTTTCTGGG<br>TTTTCCCCGTATGGCGCGCCGGTACCGAAT-3'<br>R: 5'-GGTGGTGTGCATTCTGGGAAGTGTTAACTGATCCAG<br>CATTTGCTGCGAGGTATGCCGAATGGGCATTTATTG-3'        |
| <i>Mdg1</i> -rpsL-neo              | F: 5'-CATAAAGATAGGTTAAAAATTTTAAATTCATAATACA<br>TTTTGTTTGGTTGGGCCTGGTATGATGGCGGGATCG-3'<br>R: 5'-TGGTTTTTATTGTGGTTTTTATTTGTGGTTTTTTAT<br>TTGTGGTTGGCTCAGAAGAACTCGTCAAGAAGGCG-3'   |
| <i>Mdg1</i> -TR                    | F: 5'-CATAAAGATAGGTTAAAAATTTTAAATTCATAATAC<br>ATTTTGTGGTTGGGCCTGGTATGATGGCGGGATCG-3'<br>R: 5'-TGGTTTTTATTGTGGTTTTTATTTGTGGTTTTTTAT<br>TTGTGGTTGGCTATGCCGAATGGGCATTTATTG-3'       |
| <i>mdg4</i> -TR-PC<br>(Fragment 1) | F: 5'-CCTGCAGGTCGACTCTAGAGA<br>GTTAACAACATAACAATGTATTG-3'<br>R: 5'-CCGGCGCGCCGGGAATGTCTACTTGAGG-3'                                                                               |
| <i>mdg4</i> -TR-PC<br>(Fragment 2) | F: 5'-AGACATTCCCGCGCGCCGGTACCGAAT-3'<br>R: 5'-TAACTGTAGATATGCCGAATGGG<br>CATTTATTGGTTTATTAGATTGGC-3'                                                                             |
| <i>mdg4</i> -TR-PC<br>(Fragment 3) | F: 5'-ATTCGGCATATCTACAGTTAGGTAGTAAGTTATG-3'<br>R: 5'-ATTCGAGCTCGGTACCCGGGAA<br>TTATATAAGTTCCAATAGGTCC-3'                                                                         |
| 3S18-TR<br>(Fragment 1)            | F: 5'-ATTCGGCATAACGAGCTTGCCCAGTACTTTTC-3'<br>R: 5'-ATTCGAGCTCGGTACCCGGGATATTGAGAAGT<br>TTGACTCGTTTATGTTATC-3'                                                                    |
| 3S18-TR<br>(Fragment 2)            | F: 5'-TAATTGTCCGGGCGCGCCGGTACCGAAT-3'<br>R: 5'-GGCAAGCTCGTATGCCGAATGGGCATTTATTG<br>GTTTATTAGATTGGC-3'                                                                            |

|                         |                                                                                                                                                                           |
|-------------------------|---------------------------------------------------------------------------------------------------------------------------------------------------------------------------|
| 3S18-TR<br>(Fragment 3) | F: 5'- CCTGCAGGTCGACTCTAGAGTCAAGAAAATG<br>TTTATAAAGCAATTGTTTG-3'<br>R: 5'- CCGGCGCGCCCGGACAATTACAGCGGTG-3'                                                                |
| sh- <i>mdg4</i> -1      | F: 5'- CTAGCAGTCGATGTGCTTAGAGAGCAATAGTT<br>ATATTCAAGCATATTGCTCTCTAAGCACATCGGCG-3'<br>R: 5'- AATTCGCCGATGTGCTTAGAGAGCAATATGCTT<br>GAATATAACTATTGCTCTCTAAGCACATCGACTG-3'    |
| sh- <i>mdg4</i> -2      | F: 5'- CTAGCAGTGGGCGACGATAGAATATAAATAGTT<br>ATATTCAAGCATATTATATTCTATCGTCGCCCGCG-3'<br>R: 5'- AATTCGCGGGCGACGATAGAATATAAATATGCTT<br>GAATATAACTATTATATTCTATCGTCGCCCACTG-3'  |
| sh- <i>mdg4</i> -3      | F: 5'- CTAGCAGTGGGTTGACACTCCACACTTATAGTT<br>ATATTCAAGCATATAAGTGTGGAGTGTCAACCGCG-3'<br>R: 5'- AATTCGCGGGTTGACACTCCACACTTATATGCTT<br>GAATATAACTATAAGTGTGGAGTGTCAACCACTG-3'  |
| sh- <i>mdg4</i> -4      | F: 5'- CTAGCAGTGCAAGTTCAGTTGCAAGAAATAGTT<br>ATATTCAAGCATATTTCTTGCAACTGAACTTGCGCG-3'<br>R: 5'- AATTCGCGCAAGTTCAGTTGCAAGAAATATGCTT<br>GAATATAACTATTTCTTGCAACTGAACTTGACTG-3' |
| sh- <i>mdg4</i> -5      | F: 5'- CTAGCAGTGGGCTAGTGATAATAACTAATAGTT<br>ATATTCAAGCATATTAGTTATTATCACTAGCCGCG-3'<br>R: 5'- AATTCGCGGGCTAGTGATAATAACTAATATGCTT<br>GAATATAACTATTAGTTATTATCACTAGCCACTG-3'  |
| sh- <i>mdg4</i> -6      | F: 5'- CTAGCAGTGCGACAAACAGGGTAGTTAATAGTT<br>ATATTCAAGCATATTAACCTGTTTGTGCGGCG-3'<br>R: 5'- AATTCGCGCGACAAACAGGGTAGTTAATATGCTT<br>GAATATAACTATTAACCTGTTTGTGCGACTG-3'        |
| sh- <i>mdg4</i> -7      | F: 5'- CTAGCAGTGGTTCTTATTTACAATCAAATAGTT<br>ATATTCAAGCATATTTGATTGTAAATAAGAACGCG-3'<br>R: 5'- AATTCGCGGTTCTTATTTACAATCAAATATGCTT<br>GAATATAACTATTTGATTGTAAATAAGAACACTG-3'  |



Supplementary Table 4

| Sample                | Genotype                               | Sequencing platform | Number of reads (pairs) | Mean read length | Total bases   | Mapping rate (%) | Source                  |
|-----------------------|----------------------------------------|---------------------|-------------------------|------------------|---------------|------------------|-------------------------|
| RNA-Seq (illumina)    |                                        |                     |                         |                  |               |                  |                         |
| embryo 0-2            | <i>w*</i> ; ac5c-Gal4/CyO; tub-Gal80ts | illumina paired end | 36,306,251              | 150              | 5,445,937,650 | 93.87            | This study              |
| embryo 2-8            | <i>w*</i> ; ac5c-Gal4/CyO; tub-Gal80ts | illumina paired end | 39,392,568              | 150              | 5,908,885,200 | 89.83            | This study              |
| L1                    | <i>y</i> ; cn bw sp                    | illumina paired end | 63,416,208              | 100              | 6,341,620,800 | 88.37            | (Graveley et al., 2011) |
| L2                    | <i>y</i> ; cn bw sp                    | illumina paired end | 71,745,818              | 100              | 7,174,581,800 | 89.04            | (Graveley et al., 2011) |
| L3                    | <i>y</i> ; cn bw sp                    | illumina paired end | 70,228,806              | 100              | 7,022,880,600 | 87.23            | (Graveley et al., 2011) |
| pupa 0h               | <i>w*</i> ; ac5c-Gal4/CyO; tub-Gal80ts | illumina paired end | 33,146,684              | 150              | 4,972,002,600 | 61.47            | This study              |
| adult                 | <i>w*</i> ; ac5c-Gal4/CyO; tub-Gal80ts | illumina paired end | 22,651,919              | 150              | 3,397,787,850 | 87.75            | This study              |
| Genome-Seq (Nanopore) |                                        |                     |                         |                  |               |                  |                         |
| acGal4                | acGal4/cyo;Gypsy-TR-1/TM3,Sb           | Nanopore GridION    | 733,441                 | 6,308            | 4,626,248,460 | 99.62            | This study              |
| acGal4; tub-Gal80ts   | acGal4/cyo;Gal80ts                     | Nanopore GridION    | 1,059,880               | 6,391            | 6,773,130,483 | 99.77            | This study              |
| DGRP379               | DGRP-379                               | Nanopore MinION     | 878,451                 | 8,449            | 7,421,727,828 | 80.76            | (Ellison and Cao.,2020) |
| DGRP732               | DGRP-732                               | Nanopore MinION     | 1,195,332               | 8,070            | 9,646,392,198 | 80.99            | (Ellison and Cao.,2020) |
